# Supplementary material
Source: PubMed Central journal article supplement (PMC5513675)
Supplement: NIHMS878388-supplement-1.pdf [file NIHMS878388-supplement-1.pdf]

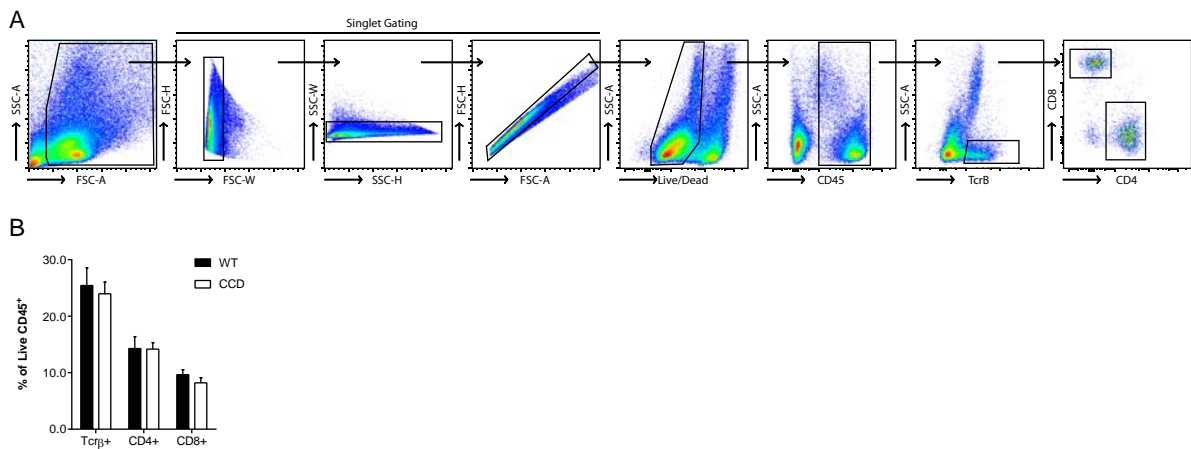

**Figure S1. Inhibition of Notch signaling does not significantly alter the percentage of T cells in the lungs during cryptococcal infection.** (A) Schematic of gating strategy used to identify Tcrβ<sup>+</sup> CD4<sup>+</sup> and CD8<sup>+</sup> T cells in the perfused lungs of *C. neoformans* infected mice. (B) Percentage (of CD45<sup>+</sup>) of all Tcrβ<sup>+</sup>, Tcrβ<sup>+</sup> CD4<sup>+</sup> and Tcrβ<sup>+</sup> CD8<sup>+</sup> T cells in the lungs of infected mice at 4 weeks post infection. Data shown are the mean frequencies ± SEM from 1 of 3 independent experiments with n=5-6/group and were not significantly different.

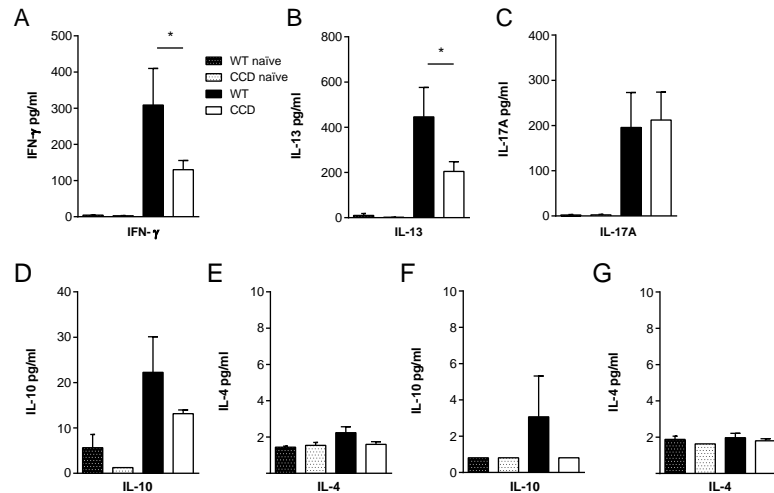

**Figure S2. Inhibition of T cell restricted Notch signaling reduces spontaneous Th1 and Th2**

**cytokine production in the lungs of mice with cryptococcal infection in the absence of exogenous re-**

**stimulation.** (A-C) Leukocytes were isolated from perfused naïve and infected lungs at 4 wpi ( $5 \times 10^6$ /ml)

and cultured for 24 hours. Cytokine levels in supernatants were measured by ELISA and cytometric bead

assays. Data are the mean  $\pm$  SEM with n=4-24 mice per group. \*p<0.05 (D-G) Inhibition of T cell

restricted notch signaling does not significantly reduce IL-4 and IL-10 production in the lungs of mice

with cryptococcal infection, even following re-stimulation. Leukocytes were isolated from perfused naïve

and infected lungs (D-E) and spleens (F-G) at 4 wpi ( $5 \times 10^6$ /ml) and stimulated with heat-killed *C.*

*neoformans* ( $10 \times 10^6$ /ml) at a 2:1 ratio for 24 or 48 hours, respectively. Cytokine levels in supernatants

were measured by ELISA and cytometric bead assays. Data are the mean  $\pm$  SEM with n=3-7 mice per

group.

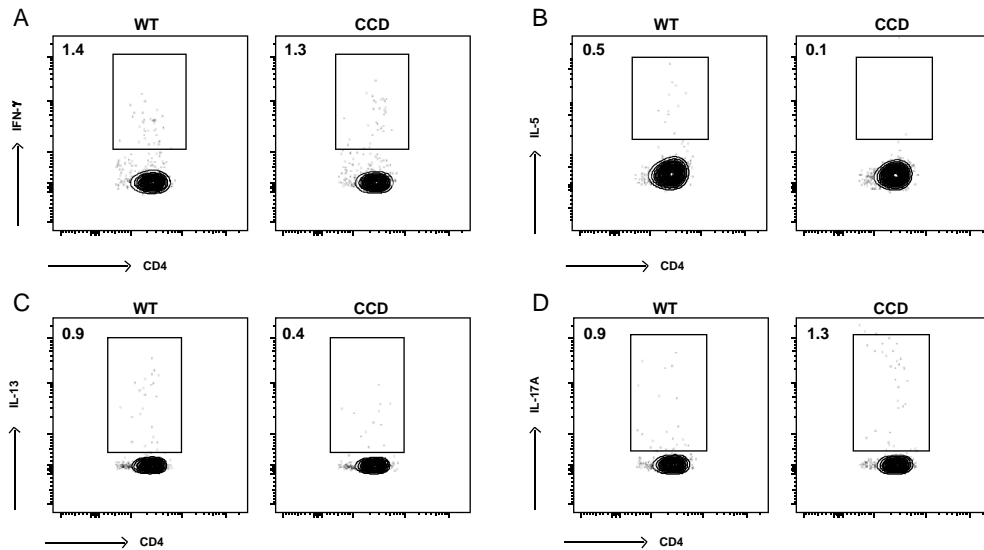

**Figure S3. Cytokine production by T cells from the lungs of naïve mice.** Lung leukocytes were isolated from perfused naïve CCD and WT mice then stimulated with plate bound anti-CD3 and anti-CD28 antibodies and analyzed for the proportion of cells producing (A) IFN- $\gamma$ , (B) IL-5, (C) IL-13 and (D) IL-17A by flow cytometry, as described in Figure 5. Representative plots shown are gated on Live, CD45<sup>+</sup>, TCR $\beta$ <sup>+</sup> CD4<sup>+</sup> T cells and FMO controls were used to set cytokine gates. The percentages of cells in the positive gate are indicated.

**Supplementary Table 1. List of primers used to quantify gene expression by qRT-PCR.**

| <b>Gene Name</b>    | <b>Primer Sequences</b>                                      |
|---------------------|--------------------------------------------------------------|
| <i>Arg1</i>         | 5'-CTAAGGACAGGCCAACAGAA-3' and 5'-CAAACCTCCATCCTCCTCCAATG-3' |
| <i>Fizz1</i>        | 5'-TTCTTGCCAATCCAGCTAAC-3' and 5'-GGGTTCTCCACCTCTTCATT-3'    |
| <i>Foxp3</i>        | 5'-CACCCAGGAAAGACAGCAACC-3' and 5'-GCAAGAGCTCTTGCCATTGA-3'   |
| <i>Gapdh</i>        | 5'-TATGTCGTGGAGTCTATTGGT-3' and 5'-GAGTTGTCATATTTCTCGTGG-3'  |
| <i>Gata3</i>        | 5'-AGAACCGGCCCTTATCAA-3' and 5'-AGTTCGCGCAGGATGTCC-3'        |
| <i>Nos2 (iNos)</i>  | 5'-GGCAGCCTGTGAGACCTTTG-3' and 5'-GCATTGGAAGTGAAGCGTTTC-3'   |
| <i>Rorc</i>         | 5'-TGTGGTTGTTGGCATTGTAG-3' and 5'-CCAGCTACCAGAGGAAGTCA-3'    |
| <i>Tbx21 (Tbet)</i> | 5'-CAACAACCCCTTTGCCAAAG-3' and 5'-TCCCCAAGCAGTTGACAGT-3'     |
| <i>Chil4 (Ym2)</i>  | 5'-CAGAAGAATGGAAGAGTCAG-3' and 5'-CAGATATGCAGGGAGTCACC-3'    |
